# Supplementary material for: Critical role of dopant in NiOx hole transport layer for mitigating redox reactivity at NiOx/absorber interface in mixed cation perovskite solar cells
Source: Royal Society of Chemistry journal article supplement (doi:10.1039/d3dt03012a), 2023-12-01
Supplement: d3dt03012a2.pdf [file d3dt03012a2.pdf]

## **Supporting Information**

# **Critical role of dopant in NiO<sub>x</sub> hole transport layer for mitigating redox reactivity at NiO<sub>x</sub> /absorber interface in mixed cation perovskite solar cells**

Vidya Sudhakaran Menon<sup>a</sup>, Saraswathi Ganesan<sup>a</sup>, Rohith Kumar Raman<sup>b</sup>, Ananthan Alagumalai<sup>a</sup>, Ananthanarayanan Krishnamoorthy<sup>a\*</sup>

<sup>a</sup>Organic and Perovskite Photovoltaics Laboratory (OPPV), Department of Chemistry, SRM Institute of Science and Technology, Kattankulathur, Tamil Nadu, India, Pin Code-603203.

<sup>b</sup>Department of Physics and Nanotechnology, SRM Institute of Science and Technology, Kattankulathur, Tamil Nadu, India, Pin Code-603203.

E-mail: [ananthak@srmist.edu.in](mailto:ananthak@srmist.edu.in)

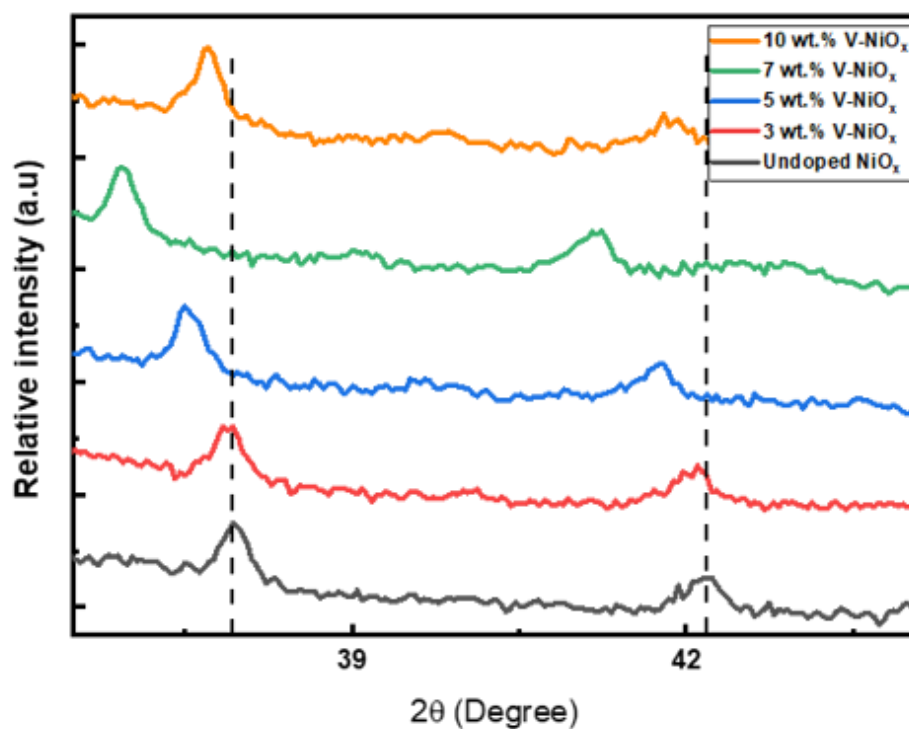

**Fig. S1.** Enlarged XRD plot of undoped and doped NiO<sub>x</sub> thin films showing shift to lower 2θ value with increased dopant concentration

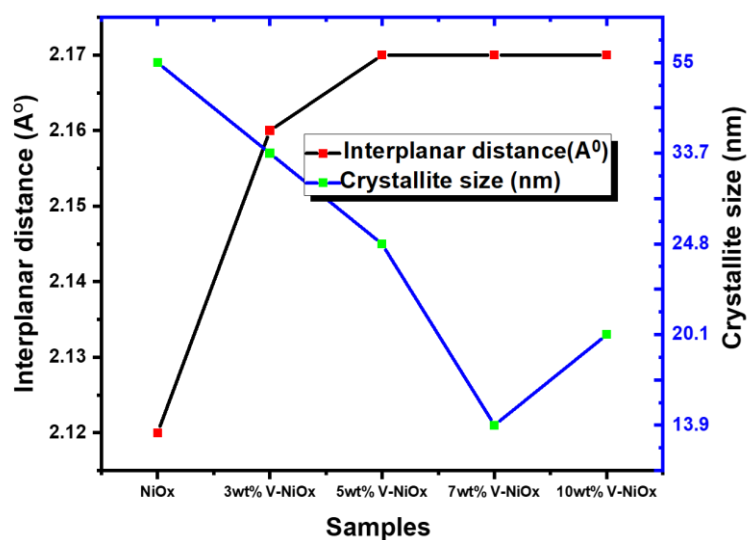

**Fig. S2.** Comparison plot of interplanar spacing and crystallite size in undoped and different wt. % V doped NiO<sub>x</sub>

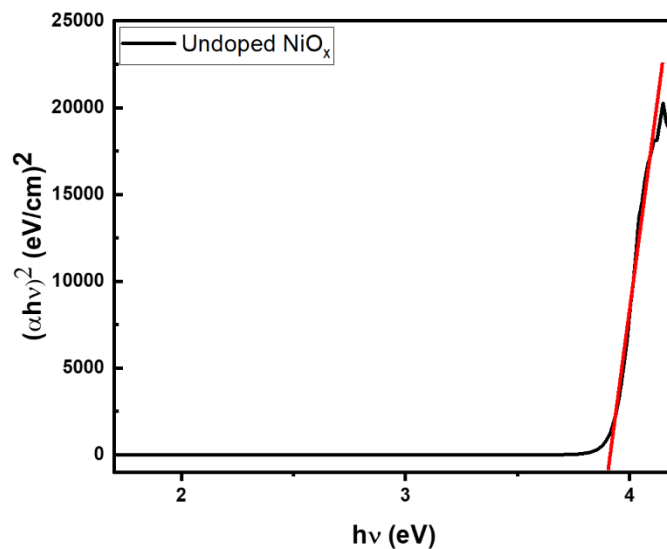

**Fig. S3.** Tauc plot of undoped NiO<sub>x</sub> thin film.

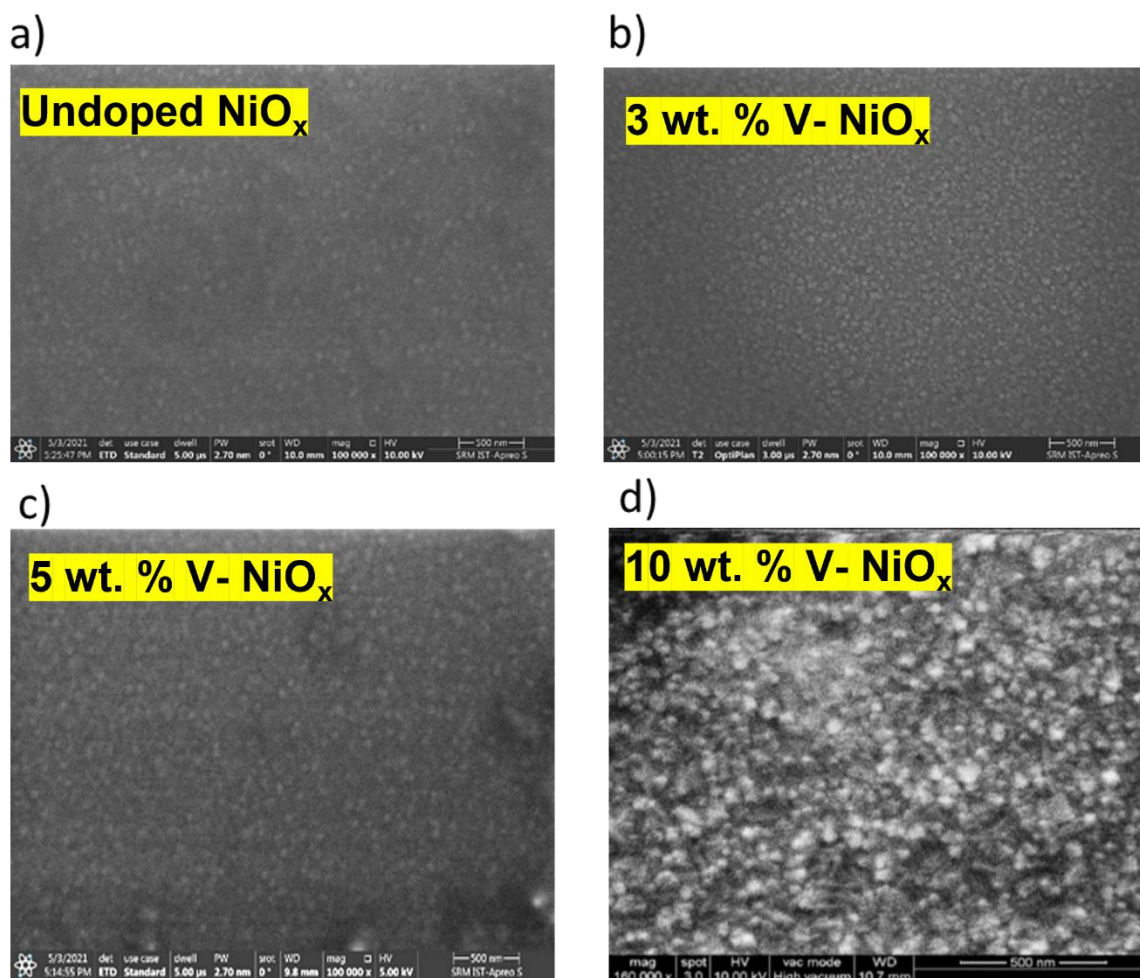

**Fig. S4.** SEM images of a) undoped NiO<sub>x</sub> b) 3 wt.% V: NiO<sub>x</sub> c) 5wt.% V: NiO<sub>x</sub> d) 10 wt.% V: NiO<sub>x</sub> thin film.

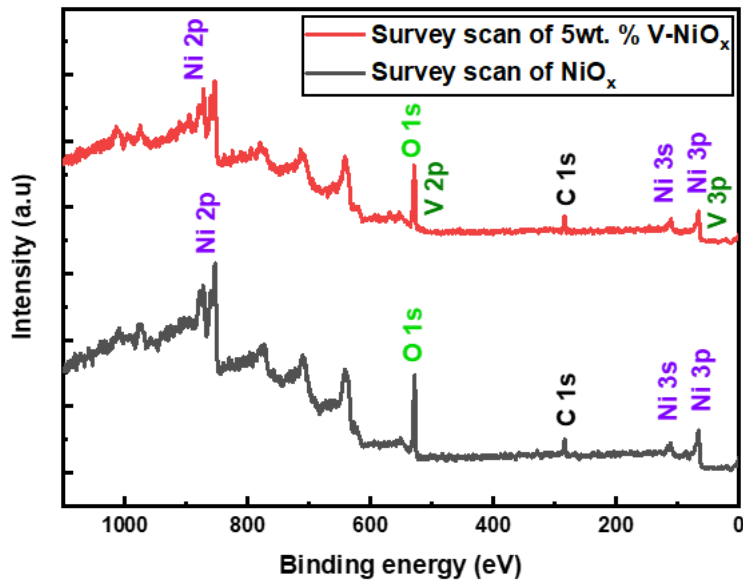

**Fig. S5.** XPS survey scan for undoped NiO<sub>x</sub> and 5 wt. % V doped NiO<sub>x</sub>

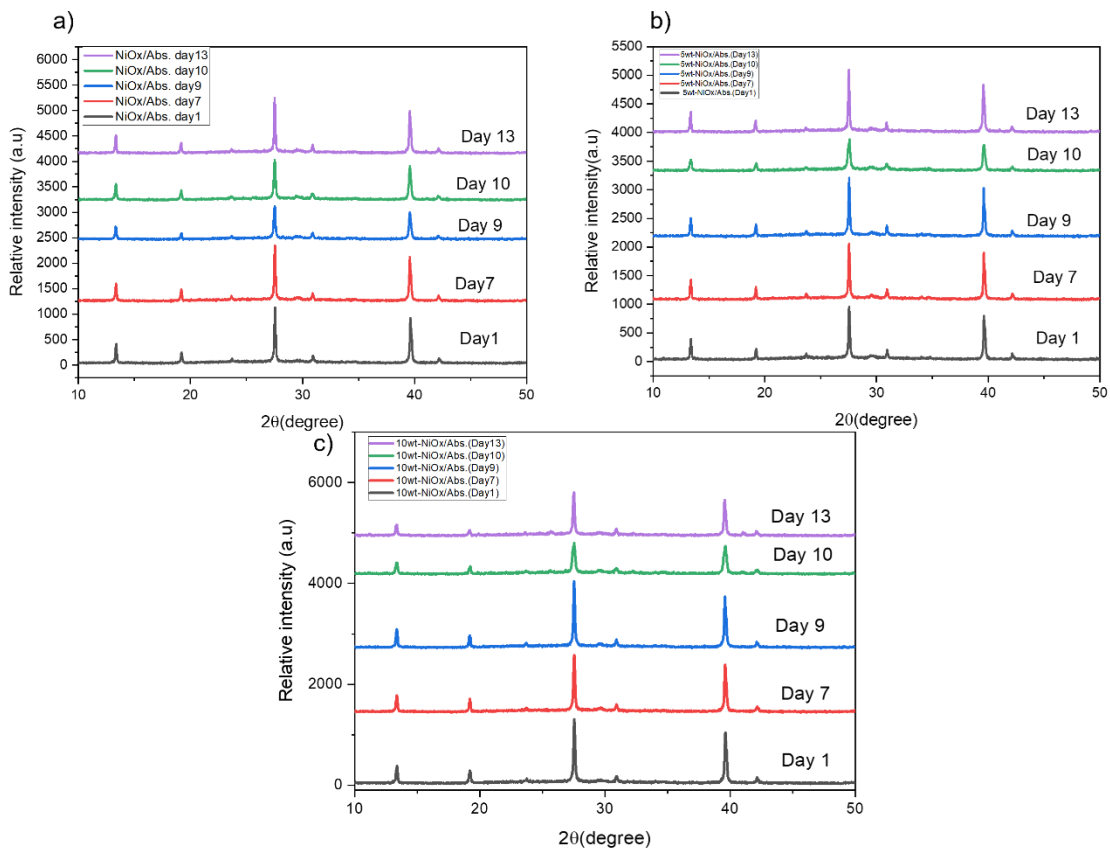

**Fig. S6.** Degradation analysis of CsFAPbI<sub>3</sub> thin films samples stored in dark, N<sub>2</sub> atmosphere for 13 days. a) CsFAPbI<sub>3</sub> absorber on undoped NiO<sub>x</sub> b) CsFAPbI<sub>3</sub> absorber on 5 wt. % V:NiO<sub>x</sub> c) CsFAPbI<sub>3</sub> on 10 wt. % V:NiO<sub>x</sub>

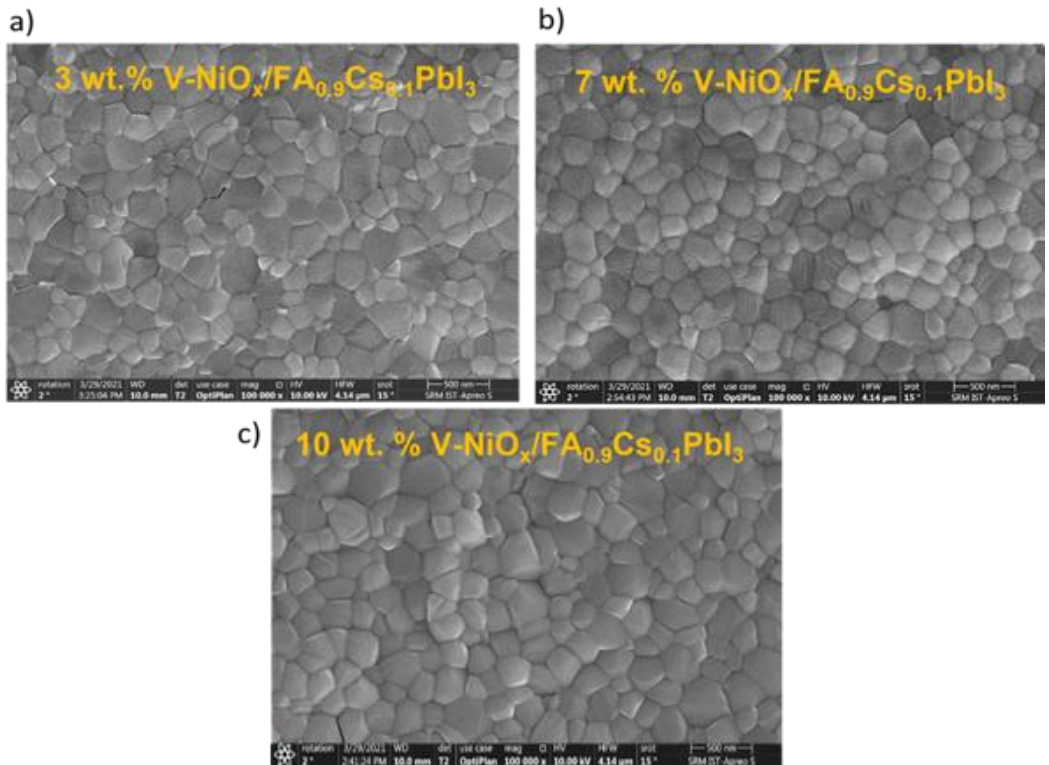

**Fig. S7.** SEM image of absorber coated on a) 3 wt. % V:NiO<sub>x</sub> b) 7 wt. % V:NiO<sub>x</sub> and c) 10 wt. % V:NiO<sub>x</sub> with inset showing corresponding grain size distribution.

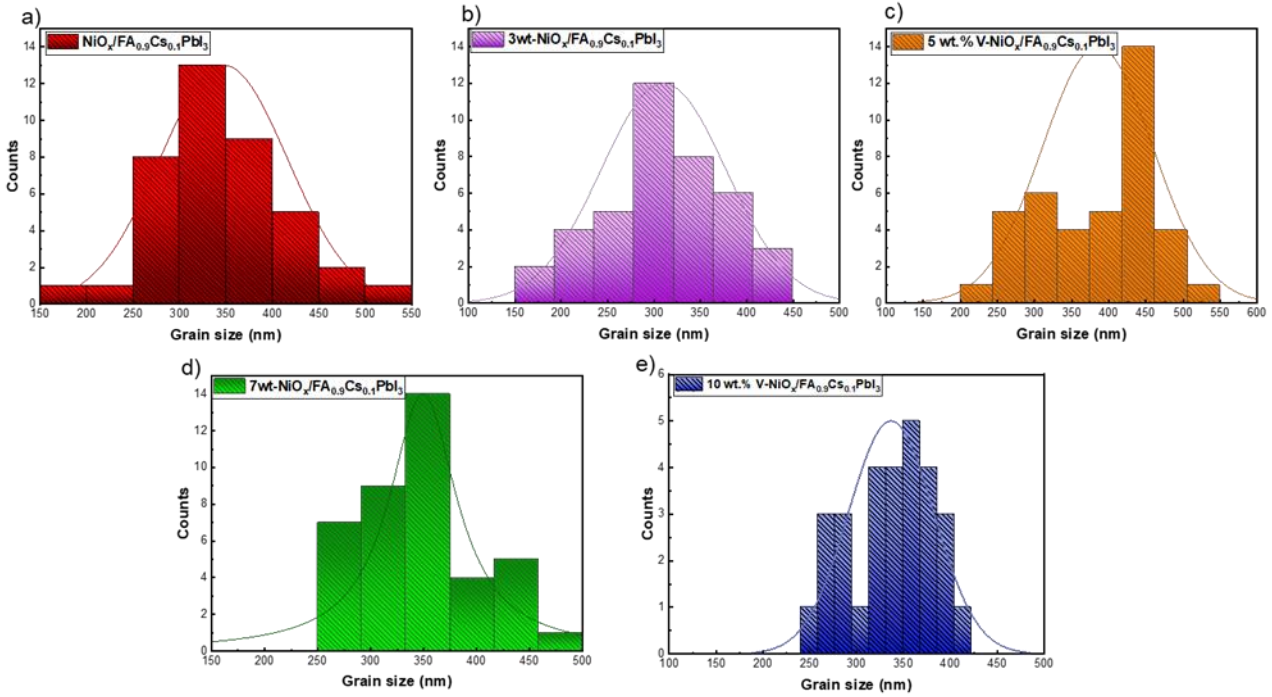

**Fig. S8.** Grain size histograms of absorber coated on top of a) undoped NiO<sub>x</sub> b) 3 wt.% V:NiO<sub>x</sub> c) 5 wt.% V:NiO<sub>x</sub> d) 7 wt.% V:NiO<sub>x</sub> and e) 10 wt.% V:NiO<sub>x</sub>.

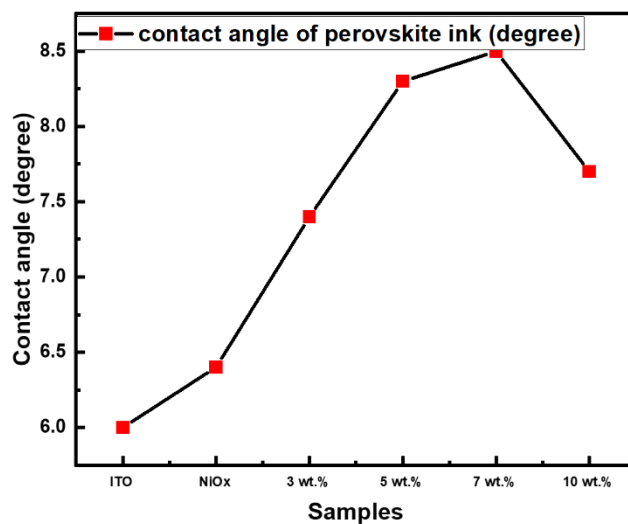

**Fig. S9.** Contact angle measurement on undoped and different wt. % V doped NiO<sub>x</sub> thin films with DMF:DMSO solvent.

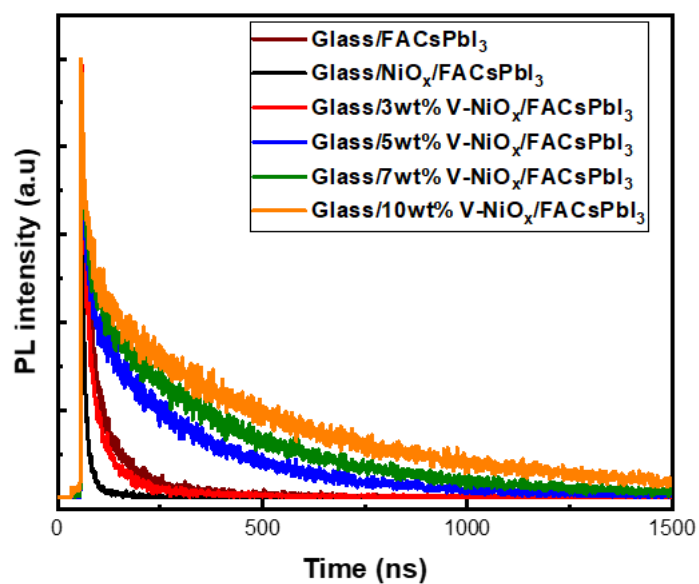

**Fig. S10.** Time resolved PL spectra of absorber on top of undoped and different wt. % V-doped NiO<sub>x</sub> HTL.

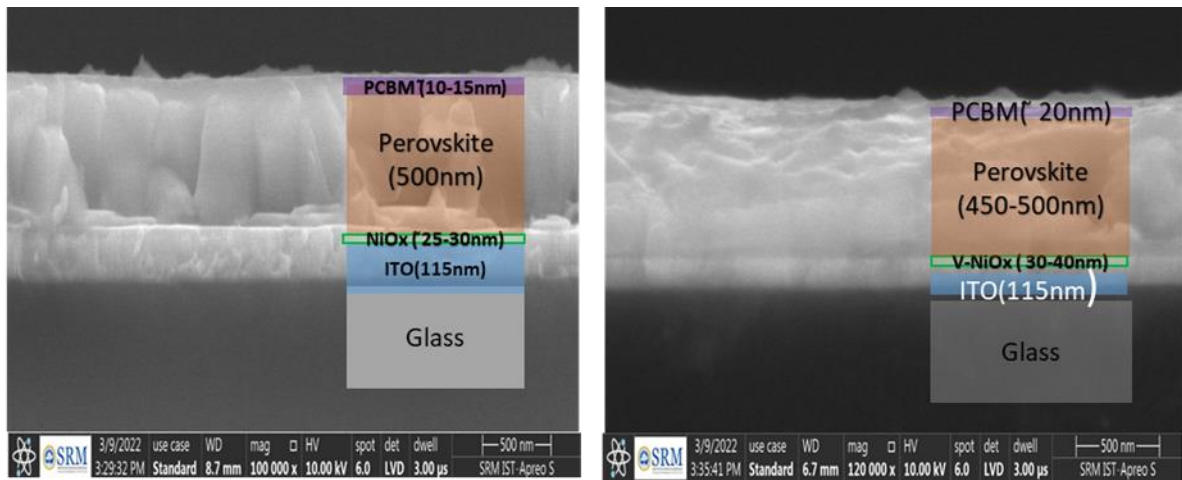

**Fig. S11.** a) Cross-section SEM images of  $\text{FA}_{0.9}\text{Cs}_{0.1}\text{PbI}_3$  absorber on undoped  $\text{NiO}_x$  HTL b) 5 wt. %  $\text{V}:\text{NiO}_x$  HTL.

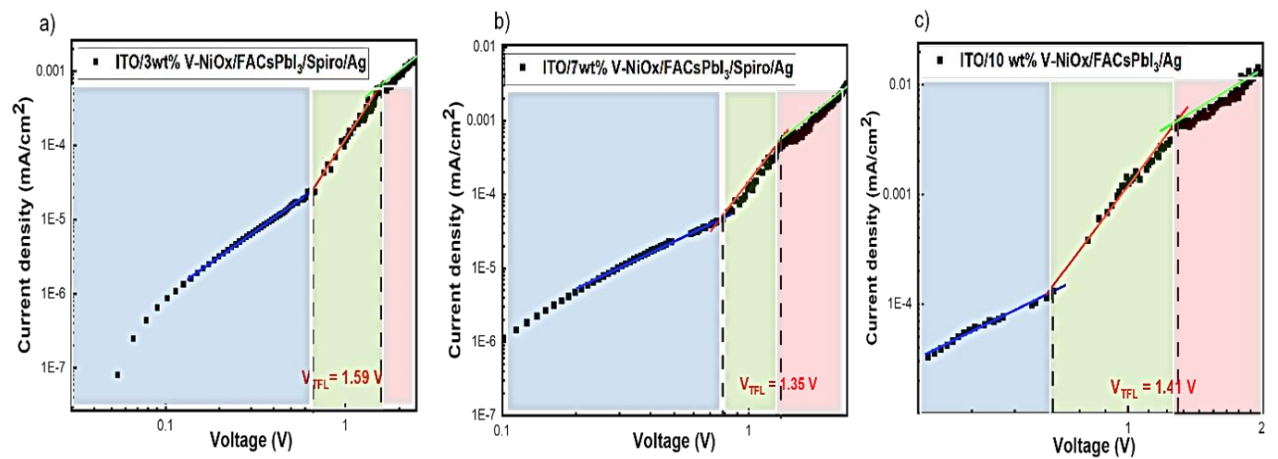

**Fig. S12.** SCLC plots of a) 3 wt. %  $\text{V}:\text{NiO}_x$  b) 7 wt. %  $\text{V}:\text{NiO}_x$  and c) 10 wt. %  $\text{V}:\text{NiO}_x$  hole only devices.

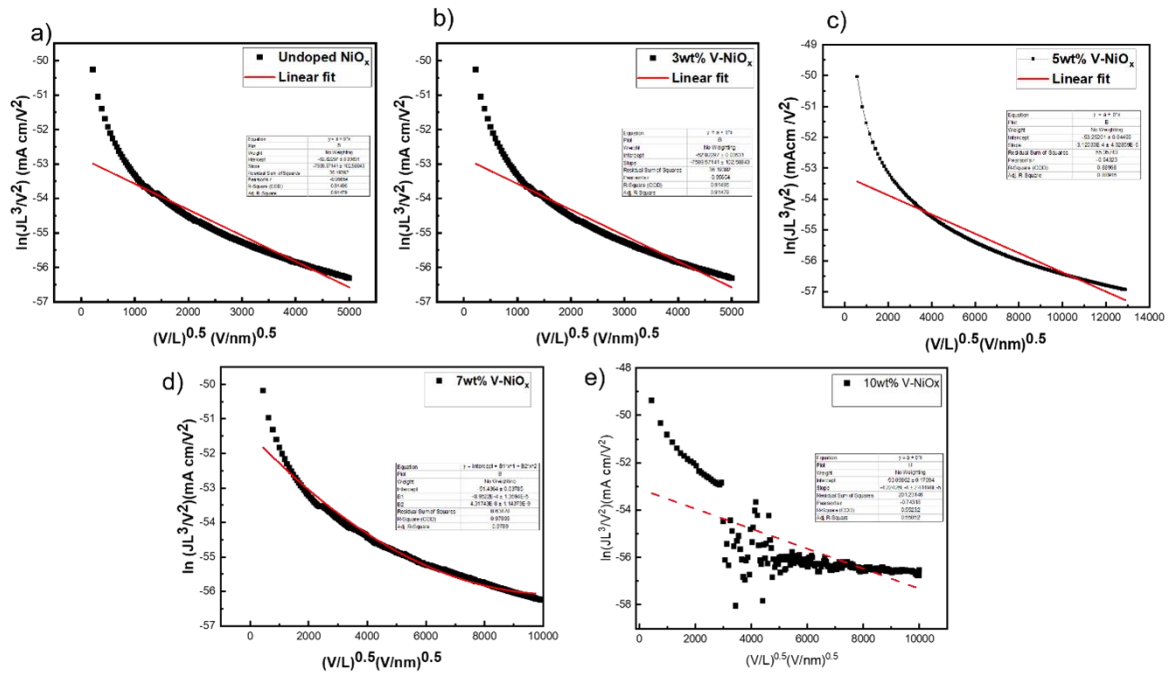

**Fig. S13.** Mobility plots of a) undoped NiO<sub>x</sub> b) 3 wt.% V:NiO<sub>x</sub> c) 5 wt.% V:NiO<sub>x</sub> d) 7 wt.% V:NiO<sub>x</sub> and e) 10 wt.% V:NiO<sub>x</sub>.

| Thin film sample              | Interplanar spacing (Å) | Crystallite size (nm) |
|-------------------------------|-------------------------|-----------------------|
| 1) Undoped NiO <sub>x</sub>   | 2.12                    | 55.4                  |
| 2) 3 wt.% V:NiO <sub>x</sub>  | 2.16                    | 33.7                  |
| 3) 5 wt.% V:NiO <sub>x</sub>  | 2.17                    | 24.8                  |
| 4) 7 wt.% V:NiO <sub>x</sub>  | 2.17                    | 13.9                  |
| 5) 10 wt.% V:NiO <sub>x</sub> | 2.17                    | 20.1                  |

**Table S1.** XRD plot parameters of interplanar spacing and crystallite size for doped and undoped NiO<sub>x</sub> thin films

| Thin film sample                                    | Crystallite size (nm) |
|-----------------------------------------------------|-----------------------|
| 1) Undoped NiO <sub>x</sub> /FACsPbI <sub>3</sub>   | 5.18                  |
| 2) 3 wt.% V:NiO <sub>x</sub> /FACsPbI <sub>3</sub>  | 12.96                 |
| 3) 5 wt.% V:NiO <sub>x</sub> /FACsPbI <sub>3</sub>  | 13.18                 |
| 4) 7 wt.% V:NiO <sub>x</sub> /FACsPbI <sub>3</sub>  | 14.14                 |
| 5) 10 wt.% V:NiO <sub>x</sub> /FACsPbI <sub>3</sub> | 19.44                 |

**Table S2.** Crystallite size of FA<sub>0.9</sub>Cs<sub>0.1</sub>PbI<sub>3</sub> absorber on doped and undoped NiO<sub>x</sub> HTL.



| Thin film sample                                    | Urbach energy $E_u$<br>(meV) |
|-----------------------------------------------------|------------------------------|
| 1) Undoped NiO <sub>x</sub> /FACsPbI <sub>3</sub>   | 31.30                        |
| 2) 3 wt.% V:NiO <sub>x</sub> /FACsPbI <sub>3</sub>  | 35.92                        |
| 3) 5 wt.% V:NiO <sub>x</sub> /FACsPbI <sub>3</sub>  | 35.77                        |
| 4) 7 wt.% V:NiO <sub>x</sub> /FACsPbI <sub>3</sub>  | 35.20                        |
| 5) 10 wt.% V:NiO <sub>x</sub> /FACsPbI <sub>3</sub> | 36.34                        |

**Table S3.** Urbach energy values for FA<sub>0.9</sub>Cs<sub>0.1</sub>PbI<sub>3</sub> absorber on doped and undoped NiO<sub>x</sub> HTL

| Thin film sample              | Surface energy (mJ/m <sup>2</sup> ) |
|-------------------------------|-------------------------------------|
| 1) Undoped NiO <sub>x</sub>   | 31.30                               |
| 2) 3 wt.% V:NiO <sub>x</sub>  | 35.92                               |
| 3) 5 wt.% V:NiO <sub>x</sub>  | 35.77                               |
| 4) 7 wt.% V:NiO <sub>x</sub>  | 35.20                               |
| 5) 10 wt.% V:NiO <sub>x</sub> | 36.34                               |

**Table S4.** Surface energy values of doped and undoped NiO<sub>x</sub> HTL.

| Sample                      | Wt. % of dopant added to precursor solution | Wt. % of dopant found in thin film sample |
|-----------------------------|---------------------------------------------|-------------------------------------------|
| 3 wt. % V:NiO <sub>x</sub>  | 3                                           | 0.53                                      |
| 5 wt. % V:NiO <sub>x</sub>  | 5                                           | 2.60                                      |
| 7 wt. % V:NiO <sub>x</sub>  | 7                                           | 4.79                                      |
| 10 wt. % V:NiO <sub>x</sub> | 10                                          | 3.07                                      |

**Table S5.** Values of dopant concentration added to precursor solution and that experimentally found in thin film samples.
